# Supplementary material for: Improved Immune Responses against Zika Virus after Sequential Dengue and Zika Virus Infection in Human
Source: Preprints.org preprint supplement (doi:10.20944/preprints201808.0030.v1), 2018-08-02
Supplement: Supplementary file 1 [file supplementary]

### DENV/ZIKV donors

**Fig. S1:** Neutralization activity against ZIKV and DENV infection using plasma samples from Naïve donors (left panels), DENV donors (middle left panels), ZIKV donors (middle right panels) and DENV/ZIKV donors (right panels). Comparison of the neutralization titer (Neut<sub>50</sub>) against DENV1-4 infection *in vitro* between ZIKV donors with or without previous DENV infection.

**Table S1 | Characteristics of the Zika virus patient cohort used for the epitope reactivity study**

| Donor <sup>a</sup> | HLA Genotyping  |          |                 |          | Serological test |   |      | Neutralizing activity (Neut50) <sup>c</sup> |            |            |            |             | PCR  |      |
|--------------------|-----------------|----------|-----------------|----------|------------------|---|------|---------------------------------------------|------------|------------|------------|-------------|------|------|
|                    | HLA-A           | HLA-B    | HLA-C           | DRB1     | DENV             |   | ZIKV | DENV1                                       | DENV2      | DENV3      | DENV4      | ZIKV        | DENV | ZIKV |
| 1                  | 02:01:01        | 35:43:01 | 01:02:01        | 04:07:01 | -                | - | +    | 17                                          | 23         | 16         | 25         | <b>311</b>  | -    | -    |
|                    | 24:02:01        | 51:01:01 | 01:02:01        | 12:01:01 |                  |   |      |                                             |            |            |            |             |      |      |
| 16                 | 01:01:01        | 15:17:01 | 07:01:01        | 13:01:01 | -                | + | +    | 158                                         | 79         | 47         | <b>357</b> | <b>2270</b> | -    | +    |
|                    | 03:01:01        | 38:01:01 | 12:03:01        | 13:02:01 |                  |   |      |                                             |            |            |            |             |      |      |
| 20                 | 01:01:01        | 07:02:01 | 07:02:01        | 04:11:01 | +                | + | +    | <b>2049</b>                                 | <b>452</b> | <b>214</b> | <b>438</b> | <b>2470</b> | +    | +    |
|                    | 31:01:02        | 39:05:01 | 07:02:01        | 15:01:01 |                  |   |      |                                             |            |            |            |             |      |      |
| 21                 | 31 <sup>b</sup> | 35:01    | 01 <sup>b</sup> | 04:01:01 | -                | - | +    | 13                                          | 13         | 19         | 14         | <b>566</b>  | -    | +    |
|                    | 03:01           | 18:01    | 17:02           | 03:01    |                  |   |      |                                             |            |            |            |             |      |      |
| 26                 | 02:01:01        | 07:02:01 | 01:02:01        | 14:02:01 | -                | + | +    | <b>5397</b>                                 | <b>601</b> | <b>735</b> | <b>235</b> | <b>2476</b> | -    | +    |
|                    | 24:02:01        | 48:01:01 | 07:02:57        | 15:01:01 |                  |   |      |                                             |            |            |            |             |      |      |
| 28                 | 02:17:01        | 40:02:01 | 03:05           | 04:11:01 | -                | + | +    | <b>75</b>                                   | 39         | 24         | <b>67</b>  | <b>5587</b> | -    | -    |
|                    | 29:02:01        | 44:03:01 | 16:01:01        | 07:01:01 |                  |   |      |                                             |            |            |            |             |      |      |
| 33                 | 24:02:01        | 15:46    | 01:02:01        | 04:07:01 | -                | + | +    | <b>306</b>                                  | 114        | 63         | 51         | <b>829</b>  | -    | -    |
|                    | 24:02:01        | 35:31    | 03:05           | 04:07:01 |                  |   |      |                                             |            |            |            |             |      |      |
| 35                 | 24:02:01        | 14:01:01 | 03:05           | 01:03    | -                | - | +    | 11                                          | 13         | 10         | <10        | <b>340</b>  | -    | -    |
|                    | 68:01:02        | 40:02:01 | 05:129          | 08:02:01 |                  |   |      |                                             |            |            |            |             |      |      |
| 37                 | 02:45           | 35:01:01 | 04:01:01        | 01:03    | -                | - | +    | 18                                          | 12         | 35         | 12         | <b>280</b>  | -    | -    |
|                    | 11:01:01        | 50:01:01 | 06:02:01        | 13:01:01 |                  |   |      |                                             |            |            |            |             |      |      |
| 42                 | 26:01:01        | 35:01:01 | 04:01:01        | 04:02:01 | -                | - | +    | 11                                          | 12         | 25         | 12         | <b>1689</b> | -    | -    |
|                    | 26:01:01        | 38:01:01 | 06:76:02        | 11:04:01 |                  |   |      |                                             |            |            |            |             |      |      |
| 46                 | 32:01:01        | 39:01:01 | 06:02:01        | 04:07:01 | -                | - | +    | 14                                          | 11         | 12         | 11         | <b>903</b>  | -    | -    |
|                    | 68:01:02        | 50:01:01 | 07:02:01        | 07:01:01 |                  |   |      |                                             |            |            |            |             |      |      |
| 53                 | 23:01:01        | 40:02:01 | 01:10           | 07:01:01 | -                | + | +    | <b>464</b>                                  | 116        | 29         | <b>543</b> | <b>3081</b> | -    | +    |
|                    | 31:01:02        | 44:03:01 | 04:01:01        | 08:02:01 |                  |   |      |                                             |            |            |            |             |      |      |
| 55                 | 03:01:01        | 35:01:01 | 04:11:01        | 01:01:01 | -                | + | +    | <b>2395</b>                                 | <b>612</b> | <b>222</b> | <b>301</b> | <b>3196</b> | -    | -    |
|                    | 11:01:01        | 51:01:01 | 15:02:01        | 07:01:01 |                  |   |      |                                             |            |            |            |             |      |      |

*Continued*

**Table S1 | Characteristics of the Zika virus patient cohort used for the epitope reactivity study – cont'd**

| Donor <sup>a</sup> | HLA Genotyping |          |          |          | Serological test |   |      | Neutralizing activity (Neut50) <sup>c</sup> |            |             |       |             | PCR  |      |
|--------------------|----------------|----------|----------|----------|------------------|---|------|---------------------------------------------|------------|-------------|-------|-------------|------|------|
|                    | HLA-A          | HLA-B    | HLA-C    | DRB1     | DENV             |   | ZIKV | DENV1                                       | DENV2      | DENV3       | DENV4 | ZIKV        | DENV | ZIKV |
| 56                 | 02:01:01       | 15:17:01 | 05:01:01 | 03:01:01 | -                | + | +    | <b>215</b>                                  | 55         | <10         | 156   | <b>110</b>  | -    | +    |
|                    | 02:01:01       | 18:01:01 | 07:01:01 | 11:01:01 |                  |   |      |                                             |            |             |       |             |      |      |
| 59                 | 03:01:01       | 35:43:01 | 01:02:01 | 04:01:01 | -                | - | +    | 31                                          | 30         | 16          | 24    | <b>194</b>  | -    | +    |
|                    | 24:02:01       | 40:01:01 | 03:04:01 | 04:07:01 |                  |   |      |                                             |            |             |       |             |      |      |
| 60                 | 02:05:01       | 55:01:01 | 01:02:01 | 11:01:01 | -                | - | +    | 11                                          | <10        | 10          | 10    | <b>514</b>  | -    | +    |
|                    | 69:01          | 58:01:01 | 07:01:01 | 13:03:01 |                  |   |      |                                             |            |             |       |             |      |      |
| 63                 | 02:01:01       | 07:02:01 | 07:02:01 | 15:01:01 | -                | + | +    | <b>999</b>                                  | 187        | 126         | 144   | <b>4057</b> | -    | -    |
|                    | 23:01:01       | 51:08:01 | 17:02:01 | 15:03:01 |                  |   |      |                                             |            |             |       |             |      |      |
| 66                 | 02:01:01       | 39:01:01 | 03:02:01 | 08:02:01 | -                | + | +    | <b>2572</b>                                 | <b>471</b> | <b>1386</b> | 167   | <b>2905</b> | -    | -    |
|                    | 03:01:01       | 40:02:01 | 07:29:01 | 15:01:01 |                  |   |      |                                             |            |             |       |             |      |      |
| 69                 | 01:01:01       | 35:01:01 | 01:02:01 | 04:07:01 | +                | + | +    | <b>749</b>                                  | <b>463</b> | <b>961</b>  | 92    | <b>1205</b> | +    | +    |
|                    | 24:02:01       | 35:43:01 | 04:01:01 | 13:05:01 |                  |   |      |                                             |            |             |       |             |      |      |
| 77                 | 02:01:01       | 40:02:01 | 04:01:01 | 13:01:01 | -                | - | +    | 17                                          | 12         | 15          | 33    | <b>110</b>  | -    | -    |
|                    | 02:01:01       | 51:01:01 | 07:01:01 | 14:02:01 |                  |   |      |                                             |            |             |       |             |      |      |

<sup>a</sup> The shaded rows show donors with previous DENV infection

<sup>b</sup> Allelic variant was not determined

<sup>c</sup> The values in each cell are the 50% neutralization titers determined from two replicates of one experiment. The highest titers for each sample is indicated in boldface

**Table S2. Characteristics of antigenic peptides from ZIKV identified in this study**

| Peptide <sup>a</sup>   | Sequence <sup>b</sup>                                | Donors | HLA <sup>c</sup>                                             | SFC/million<br>PBMC <sup>d</sup> |       | Predicted epitope | Predicted<br>HLA | Score<br>(rank) <sup>e</sup> |
|------------------------|------------------------------------------------------|--------|--------------------------------------------------------------|----------------------------------|-------|-------------------|------------------|------------------------------|
|                        |                                                      |        |                                                              | 15-mer                           | 9-mer |                   |                  |                              |
| C <sub>13-27</sub>     | IVNML <u>LKRGVARV</u> SPF                            | 28     | A <u>02</u> ,29; B40,44; C03,16; DRB104,07                   | 170                              | <20   | MLKRGVARV         | A0217            | 1.9                          |
|                        |                                                      | 60     | A <u>02</u> ,69; B55,58; C01,07; DRB111,13                   | 50                               | 60    |                   | A0205            | 1.3                          |
| C <sub>85-99</sub>     | KKDLA <u>AAMLRI</u> INARK                            | 26     | A <u>02</u> ,24; B07,48; C01,07; DRB114,15                   | 100                              | <20   | AAMLRIINA         | A0201            | 4.5                          |
|                        |                                                      | 60     | A <u>02</u> ,69; B55,58; C01,07; DRB111,13                   | <20                              | 75    | KDLAAMLRI         | B5501            | 1.4                          |
|                        | KKDLA <u>AAMLRI</u> INARK                            | 28     | A <u>02</u> ,29; B40,44; C03,16; DRB104,07                   | 230                              | 65    |                   | B4002            | 2.0                          |
| E <sub>455-469</sub>   | GMSWFSQILIGTLLM                                      | 1      | A <u>02</u> ,24; B35, <u>51</u> ; C01,01; DRB104,12          | 120                              | NT    | GMSWFSQILI        | A0201            | 0.9                          |
|                        |                                                      | 77     | A <u>02</u> , <u>02</u> ; B40, <u>51</u> ; C04,07; DRB113,14 | 35                               | NT    | MSWFSQILI         | B5101            | 0.12                         |
| NS1 <sub>63-77</sub>   | MEN <u>IMWRS</u> VEGELNA<br>MEN <u>IMWRS</u> VEGELNA | 21     | A31,03; B35,18; C01,17; DRB1 <u>04</u> ,03                   | 65                               | 50    | MENIMWRSVEGELNA   | DRB10405         | 50                           |
|                        |                                                      | 28     | A <u>02</u> ,29; B40,44; C03,16; DRB1 <u>04</u> ,07          | 245                              | 58    | IMWRSVEGEL        | A0217            | 0.5                          |
|                        |                                                      | 56     | A <u>02</u> , <u>02</u> ; B15,18; C05,07; DRB103,11          | 70                               | 148   |                   | A0201            | 1.2                          |
| NS1 <sub>83-97</sub>   | G <u>VQLT</u> VVVGSVKNPM                             | 26     | A <u>02</u> ,24; B07,48; C01,07; DRB114,15                   | 145                              | 23    | VQLTVVVGSV        | A0201            | 1.7                          |
|                        |                                                      | 28     | A <u>02</u> ,29; B40,44; C03,16; DRB104,07                   | 165                              | 35    |                   | A0217            | 3                            |
| NS1 <sub>163-177</sub> | FHTSV <u>WLKV</u> REDYSL<br>FHTSV <u>WLKV</u> REDYSL | 28     | A02,29; B40,44; C03,16; DRB1 <u>04</u> ,07                   | 230                              | 75    | HTSVWLKVREDY      | A0101            | 0.4                          |
|                        |                                                      | 55     | A03,11; B35,51; C04,15; DRB101,07                            | 110                              | 125   | HTSVWLKVR         | A3101            | 0.4                          |
|                        |                                                      | 46     | A32,68; B39,50; C06,07; DRB1 <u>04</u> ,07                   | 50                               | 32    |                   | A6801            | 0.6                          |
|                        |                                                      | 20     | A01,31; B07,39; C07,07; DRB1 <u>04</u> ,15                   | 310                              | 105   | VWLKVREDY         | A2902            | 1.3                          |
|                        |                                                      |        |                                                              |                                  |       | FHTSVWLKV         | B3905            | 0.4                          |
|                        |                                                      |        |                                                              |                                  |       |                   | B3901            | 0.4                          |
| NS1 <sub>275-289</sub> | IRFEE <u>CPG</u> TKVHVEE                             | 33     | A24,24; B15, <u>35</u> ; C01,03; DRB104,04                   | 215                              | 55    | CPGTKVHVE         | B3501            | 8.5                          |
|                        |                                                      | 55     | A03,11; B <u>35</u> ,51; C04,15; DRB101,07                   | 130                              | 115   |                   | B3531            | 6.5                          |

*Continued*

**Table S2. Characteristics of antigenic peptides from ZIKV identified in this study – cont'd**

| Peptide <sup>a</sup>    | Sequence <sup>b</sup> | Donors | HLA <sup>c</sup>                  | SFC/million<br>PBMC <sup>d</sup> |       | Predicted epitope | Predicted<br>HLA | Score<br>(rank) <sup>e</sup> |
|-------------------------|-----------------------|--------|-----------------------------------|----------------------------------|-------|-------------------|------------------|------------------------------|
|                         |                       |        |                                   | 15-mer                           | 9-mer |                   |                  |                              |
| NS2B <sub>117-131</sub> | AAGAWYVYVKTGKRS       | 55     | A03,11; B35,51; C04,15; DRB101,07 | 445                              | NT    | AAGAWYVYVK        | A0301            | 0.6                          |
|                         |                       |        |                                   |                                  |       |                   | A1101            | 0.12                         |
|                         |                       |        |                                   |                                  |       | YVYVKTGKR         | A0301            | 1.8                          |
| NS3 <sub>219-233</sub>  | TVILAPTRVVAAEME       | 53     | A23,31; B40,44; C01,04; DRB107,08 | 100                              | NT    | TVILAPTRVVAAEME   | DRB10802         | 1.5                          |
|                         |                       | 66     | A02,03; B39,40; C03,07; DRB108,15 | 65                               | NT    | ILAPTRVVAA        | A0201            | 1.6                          |
| NS3 <sub>271-285</sub>  | LQPIRVPNYNLYIMD       | 42     | A26,26; B35,38; C05,06; DRB104,11 | 165                              | NT    | VPNYNLYIM         | B3501            | 0.06                         |
| NS3 <sub>311-325</sub>  | AAIFMTATPPGTRDA       | 28     | A02,29; B40,44; C03,16; DRB104,07 | 255                              | 85    | AAIFMTATPPGTRDA   | DRB10401         | 4                            |
|                         |                       |        |                                   |                                  |       | FMTATPPGT         | A0217            | 5.5                          |
|                         | AAIFMTATPPGTRDA       | 33     | A24,24; B15,35; C01,03; DRB104,04 | 215                              | 30    | IFMTATPPG         | A2402            | 5                            |
| NS4A <sub>86-100</sub>  | VTLGASAWLMWLSEI       | 55     | A03,11; B35,51; C04,15; DRB101,07 | 178                              | NT    | SAWLMWLSEI        | B5101            | 0.9                          |
|                         |                       | 60     | A02,69; B55,58; C01,07; DRB111,13 | 125                              | NT    | VTLGASAWL         | A6901            | 1.3                          |
|                         |                       |        |                                   |                                  |       | LGASAWLMW         | B5801            | 0.07                         |
| NS4B <sub>112-126</sub> | AIILLVAHYMYLIPG       | 28     | A02,29; B40,44; C03,16; DRB104,07 | 60                               | 58    | AIILLVAHY         | A2902            | 0.6                          |
|                         |                       | 37     | A02,11; B35,50; C04,06; DRB101,13 | 75                               | 30    |                   | A1101            | 3.5                          |
|                         | AIILLVAHYMYLIPG       | 60     | A02,69; B55,58; C01,07; DRB111,13 | 100                              | 68    | LLVAHYMYL         | A0205            | 0.3                          |
|                         | AIILLVAHYMYLIPG       | 60     | A02,69; B55,58; C01,07; DRB111,13 | 100                              | 35    | LVAHYMYLI         | A6901            | 0.15                         |
|                         |                       |        |                                   |                                  |       |                   | A0205            | 0.2                          |
| NS5 <sub>13-27</sub>    | KARLNQMSALEFYSY       | 55     | A03,11; B35,51; C04,15; DRB101,07 | 260                              | NT    | MSALEFYSY         | B3501            | 0.15                         |
|                         |                       | 69     | A01,24; B35,35; C01,04; DRB104,13 | 145                              | NT    |                   | A0101            | 0.09                         |

*Continued*

**Table S2. Characteristics of antigenic peptides from ZIKV identified in this study – cont'd**

| Peptide <sup>a</sup>   | Sequence <sup>b</sup>   | Donors | HLA <sup>c</sup>                                    | SFC/million<br>PBMC <sup>d</sup> |       | Predicted epitope | Predicted<br>HLA | Score<br>(rank) <sup>e</sup> |
|------------------------|-------------------------|--------|-----------------------------------------------------|----------------------------------|-------|-------------------|------------------|------------------------------|
|                        |                         |        |                                                     | 15-mer                           | 9-mer |                   |                  |                              |
| NS5 <sub>293-307</sub> | WFFDEN <u>HPYRTWAYH</u> | 55     | A03,11; B <u>35</u> ,51; C04,15; DRB101,07          | 1580                             | 308   | HPYRTWAYH         | B3501            | 0.4                          |
|                        | W <u>FFDENHPYRTWAYH</u> | 69     | A01,24; B <u>35,35</u> ; C01,04; DRB104,13          | 40                               | 218   | FFDENHPY          | A0101            | 1.6                          |
| NS5 <sub>297-311</sub> | <u>ENHPYRTWAY</u> HGSYE | 55     | A03,11; B <u>35</u> ,51; C04,15; DRB101,07          | 1280                             | 358   | NHPYRTWAY         | B3501            | 3                            |
|                        | EN <u>HPYRTWAYHGSYE</u> | 69     | A01,24; B <u>35,35</u> ; C01,04; DRB104,13          | 75                               | 188   | YRTWAYHGSY        | B3501            | 1.7                          |
|                        | ENHPY <u>RTWAYHGSYE</u> | 69     | A01,24; B <u>35,35</u> ; C01,04; DRB104,13          | 75                               | 205   | RTWAYHGSY         | A0101            | 0.3                          |
| NS5 <sub>345-359</sub> | TDT <u>TPYGQQRVFKEK</u> | 55     | A03,11; B <u>35</u> ,51; C04,15; DRB101,07          | 2095                             | 523   | TPYGQQRVF         | A0101            | 0.5                          |
|                        |                         | 69     | A01,24; B <u>35,35</u> ; C01,04; DRB104,13          | 785                              | 763   |                   | A0101            | 0.3                          |
|                        |                         | 33     | A24,24; B15, <u>35</u> ; C01,03; DRB104,04          | 1315                             | 395   |                   | B3531            | 0.7                          |
| NS5 <sub>425-439</sub> | <u>EAVNDPRFWALVDKE</u>  | 55     | A03,11; B35,51; C04,15; DRB101,07                   | 120                              | 125   | AVNDPRFWALVDK     | A1101            | 0.6                          |
|                        |                         | 56     | A02,02; B15,18; C05,07; DRB103,11                   | 90                               | 240   |                   | A0301            | 1.1                          |
|                        |                         | 28     | A02,29; B40,44; C03,16; DRB104,07                   | 150                              | 100   |                   | A0301            | 1.1                          |
| NS5 <sub>461-475</sub> | KKQGEFGKAKGSRAI         | 53     | A23,31; B <u>40</u> ,44; C01,04; DRB1 <u>07</u> ,08 | 105                              | NT    | GEFGKAKGSRAI      | B4002            | 0.7                          |
|                        |                         | 28     | A02,29; B <u>40</u> ,44; C03,16; DRB104, <u>07</u>  | 300                              | NT    | KKQGEFGKAKGSRAI   | DRB10701         | 32                           |
| NS5 <sub>473-487</sub> | RAIWMWLGARFLEF          | 55     | A03,11; B35,51; C04,15; DRB101, <u>07</u>           | 295                              | NT    | AIWMWLGAR         | A0301            | 1.3                          |
|                        |                         | 28     | A02,29; B40,44; C03,16; DRB104, <u>07</u>           | 210                              | NT    | YMWLGARFL         | A0217            | 0.03                         |
|                        |                         |        |                                                     |                                  |       | RAIWMWLGARFLEF    | DRB10701         | 16                           |

*Continued*

**Table S2. Characteristics of antigenic peptides from ZIKV identified in this study – cont'd**

| Peptide <sup>a</sup>   | Sequence <sup>b</sup>           | Donors | HLA <sup>c</sup>                           | SFC/million<br>PBMC <sup>d</sup> |       | Predicted epitope | Predicted<br>HLA | Score<br>(rank) <sup>e</sup> |
|------------------------|---------------------------------|--------|--------------------------------------------|----------------------------------|-------|-------------------|------------------|------------------------------|
|                        |                                 |        |                                            | 15-mer                           | 9-mer |                   |                  |                              |
| NS5 <sub>546-560</sub> | RFDLENEALITNQME                 | 28     | A02,29; B <b>40</b> ,44; C03,16; DRB104,07 | 245                              | NT    | NEALITNQM         | B4002            | 0.8                          |
|                        |                                 | 53     | A23,31; B <b>40</b> ,44; C01,04; DRB107,08 | 190                              | NT    |                   | B4403            | 0.6                          |
|                        |                                 | 66     | A02,03; B39, <b>40</b> ; C03,07; DRB108,15 | 80                               | NT    |                   | B3901            | 1.8                          |
| NS5 <sub>565-579</sub> | LALAIKYTYQNKVV                  | 28     | A02,29; B <b>40</b> ,44; C03,16; DRB104,07 | 240                              | NT    | LALAIKYTY         | A2902            | 0.5                          |
|                        |                                 | 53     | A23,31; B <b>40</b> ,44; C01,04; DRB107,08 | 120                              | NT    | ALAIKYTY          | A2902            | 0.25                         |
|                        |                                 | 56     | A02,02; B15,18; C05,07; DRB103,11          | 150                              | NT    | LALAIKYTY         | B1517            | 1.2                          |
| NS5 <sub>605-619</sub> | QVV <b><u>TYALNTFTNL</u></b> VV | 33     | A <b>24,24</b> ; B15,35; C01,03; DRB104,04 | 240                              | NT    | TYALNTFTNL        | A24:02           | 0.09                         |
|                        |                                 | 59     | A03, <b>24</b> ; B35,40; C01,03; DRB104,04 | 50                               | 42    | YALNTFTNL         | B35:43           | 0.4                          |
|                        |                                 |        |                                            |                                  |       |                   | B35:31           | 0.25                         |

<sup>a</sup> The position of peptides were determined according to NCBI Reference Sequence YP\_002790881.1; <sup>b</sup> The underlined and in bold sequence correspond to the 9-mer peptide tested; <sup>c</sup> The common alleles between donors are underlined and in bold; <sup>d</sup> Cumulative SFC/million PBMC; NT, not tested; <sup>e</sup> Calculated using NetMHCpan 3.0 Server: strong binders <0.5, weak binders <2.
